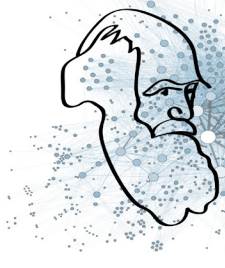

# Peer Community In Evolutionary Biology

---

Loire E, Galtier N 2017.

**Lacking conservation genomics in the giant Galápagos tortoise**

*bioRxiv* 101980, <http://dx.doi.org/10.1101/101980>

**A Preprint reviewed and recommended by *Peer Community In Evolutionary Biology*:**

<http://dx.doi.org/10.24072/pci.evolbiol.100031>

5

10

**Lacking conservation genomics in the giant Galápagos tortoise.**

15

Etienne Loire<sup>1</sup>, Nicolas Galtier<sup>2</sup>

20

<sup>1</sup> Centre de Coopération Internationale en Recherche Agronomique pour le Développement  
25 (CIRAD), UMR CMAEE and C2B, Montpellier (France)

<sup>2</sup> Institute of Evolutionary Sciences, University Montpellier, CNRS, IRD, EPHE (France)

30 **Data accessibility:** no new data was produced

## Abstract

35 This preprint has been reviewed and recommended by Peer Community In Evolutionary  
Biology (<http://dx.doi.org/10.24072/pci.evolbiol.100031>).

Conservation policy in the giant Galápagos tortoise, an iconic endangered animal, has been assisted  
by genetic markers for ~15 years: a dozen loci have been used to delineate thirteen (sub)species,  
between which hybridization is prevented. Here, comparative reanalysis of a previously published  
40 NGS data set reveals a conflict with traditional markers. Genetic diversity and population  
substructure in the giant Galápagos tortoise are found to be particularly low, questioning the genetic  
relevance of current conservation practices. Further examination of giant Galapagos tortoise  
population genomics is critically needed.

45

Biological conservation implies collaboration between scientists, biodiversity managers and policy makers. We can only applaud when scientific progress influences policies and practices in a way that is beneficial to nature, and ultimately to humans. A recent Comment in Nature (Nichols 2015) highlights a spectacular conservation initiative geared towards an iconic endangered species – the giant Galápagos tortoise.

The Galápagos Islands host a number of fascinating endemic animals, such as Darwin's finches, Galápagos iguanas and Galápagos penguins and their preservation is clearly a major issue. These Islands are a paramount conservation priority. Remarkable efforts have been made by the Charles Darwin Research Station and the Galápagos National Park Service to protect indigenous species while eradicating invasive ones (e.g. Marquez et al. 2013). The Galapagos tortoise, *Chelonoidis nigra*, is probably the most emblematic of all species of the archipelago. These large tortoises have been heavily impacted by human activities over the centuries. Since the mid-1960s they have been the focus of a specific long-term conservation program, which has been fully successful in terms of population density recovery (e.g. Gibbs et al. 2014, Aguilera et al. 2015). The program mainly involved bringing eggs or adults from natural sites to rearing/breeding centers, and releasing in the field juveniles of sufficient size, thus escaping predation by rats (Cayot 2008).

Since the 2000's, population genetics research has been instrumental in the management plan of Galápagos tortoises. Thirteen giant Galápagos tortoise species (Poulakakis et al. 2015) have been described, or confirmed, using genetic data – specifically, mitochondrial DNA and 9-12 microsatellite loci (Caccone et al. 2002, Ciofi et al. 2002). Based on this information, population densities have been monitored in a way that aims at preserving, or even restoring, the integrity of the distinct gene pools (e.g. Milinkovitch et al. 2004, Garrick et al. 2012, Edwards et al. 2014). Milinkovitch et al. (2007), for instance, identified one "hybrid" individual among the thousands that had been repatriated to the Española island after captive breeding. This was removed from the field. Garrick et al. (2012) and Edwards et al. (2013) discuss the "conservation value" of individuals based on their genotypes. The most recent implementation of this strategy is an attempt to recreate the genome of the famous Lonesome George tortoise, the last member of the *C. (nigra) abingdoni* species, which died in 2012. The plan is to cross individuals from another species that carry *abingdoni* alleles – hence the recent transfer by helicopter and boat of 32 tortoises from their current habitat to the island of Santa Cruz (Nichols 2015).

80

Some problems, however, still hamper the task of defining *C. nigra* taxonomic and conservation units. For instance, mitochondrial DNA and microsatellite data do not fully agree (Poulakakis et al. 2012). Published levels of mitochondrial coding sequence divergence between named species of giant Galápagos tortoises (<1%, Caccone et al. 2004) are not higher than typical amounts of within-  
85 species mitochondrial polymorphism in reptiles (Bazin et al. 2006). Importantly, individuals carrying so-called 'hybrid' genotypes or unexpected mitochondrial haplotypes, given their geographic origin, are common in the field (e.g. Garrick et al. 2012). Because they are interpreted as being the result of non-natural causes (Russello et al. 2007, Poulakakis et al. 2008), such individuals have been removed from published analyses (Garrick et al. 2014, Poulakakis et al. 2015), thus  
90 artificially inflating measured levels of genetic differentiation between entities. In spite of this bias, estimated  $F_{ST}$  as low as 0.1 were considered sufficient to delineate species (Poulakakis et al. 2015), in absence of evidence for hybrid depression or local adaptation. Indeed, very little is known regarding the link between genetic variation, morphological variation and fitness in *C. nigra*. The conspicuous "saddleback" morphotype, for instance, is observed in several unrelated species that  
95 carry various combinations of mtDNA haplotypes and microsatellite alleles (e.g. Poulakakis et al. 2012), and the heritability of this trait is so far unknown (Chiari et al. 2009). Whether gene flow, if any, is recent and human mediated, or ancient and "natural", is critical with respect to conservation policy in *C. nigra*.

100 Four years ago, we published the blood transcriptome of five giant Galápagos tortoises which, based on mtDNA, were assigned to three distinct species – *becki*, *vandenburghi*, and *porteri* (Loire et al. 2013). To our surprise, our analysis of ~1000 coding loci did not reveal any evidence of genetic structure in this sample, i.e. the homozygosity of the five individuals was not higher than expected under the hypothesis that they belonged to a single panmictic population. The total genetic variation  
105 detected in the sample was also quite low – heterozygosity was around 0.1%, consistent with earlier findings (Caccone et al. 2004).

Here we looked at the situation from a comparative standpoint and plotted the inbreeding coefficient  $F$  as a function of log-transformed synonymous diversity,  $\pi_s$ , in a dataset of 53 species of animals  
110 for which the transcriptome of at least four individuals sampled from different populations was available (Perry et al. 2014, Romiguier et al. 2014, Table S1). The synonymous diversity  $\pi_s$  measures heterozygosity at (presumably neutral) third codon positions;  $\pi_s$  is an unbiased estimate of the  $\theta=4.N_e.\mu$  parameter, where  $N_e$  is the effective population size and  $\mu$  is the per-base, per-generation mutation rate. Inbreeding coefficient  $F$  measures the departure from Hardy-Weinberg

115 equilibrium by comparing the expected and observed numbers of heterozygous genotypes, here  
summed across individuals and loci.  $F$  is expected to equal zero in absence of population structure,  
and to take positive values when individuals are more homozygous, on average, than expected  
under the assumption of panmixy. Data on all species in this dataset were analysed via the same  
120 procedure (Gayral et al. 2013, Ballenghien et al. 2017), thus ensuring optimal comparability  
between data points. Figure 1 indicates that *C. nigra* harbours lower genetic polymorphism and  
population structuring than most vertebrates or other animal species, which casts serious doubts on  
the existence of several differentiated gene pools in this taxon. Interestingly, the data point closest to  
*C. nigra* in this figure is *Homo sapiens* – a species in which very few people would argue the need  
to define (sub)species.

125

The above analysis is based on small samples – from five to eleven individuals per species – which  
in most cases precluded definition of sub-populations and calculation of the  $F_{ST}$  statistics – but note  
that a significantly positive  $F_{ST}$ , if any, should imply a significantly positive  $F$ , and that  $F$  in this  
analysis was calculated using the method of Weir and Cockerham (1984), which accounts for small  
130 sample size. Our analysis might be affected by, *e.g.*, sequencing errors, genotyping errors, hidden  
paralogy, cross-contamination or other experimental artefacts (Ballenghien et al. 2017). To control  
for possible sources of noise and confirm that our approach has the power to identify strong genetic  
structure when it exists, we similarly analysed samples made of individuals from two congeneric  
species (Galtier 2016, Table S1). Distinctively high values of  $F$  were obtained with the two-species  
135 samples, compared to the single-species ones (Figure 1, open circles), casting further doubts on the  
hypothesis that our *C. nigra* sample comprises individuals from more than one species.

It was suggested from mtDNA and microsatellite data that some *C. nigra* individuals are of "hybrid  
origin", *i.e.*, F1 from "purebred" parents or backcrosses (*e.g.* Russello et al. 2010, Garrick et al.  
140 2014). Among the four individuals of our sample for which microsatellite data are available, two  
were consistently assigned to the same population by the three methods used by Russello et al.  
(2010), whereas two obtained conflicting assignments. Russello et al. (2010) analyzed 156  
individuals of unknown geographic origin. Re-analysing their Table S1, we found that 109 of these  
(70%) were assigned to two or three distinct populations by the three methods they used. Our  
145 sample, therefore, is not particularly enriched in individuals of "hybrid origin". Still, to control for a  
possible impact of hybrids in our analysis, we calculated the maximal  $F$  across the ten possible pairs  
of individuals from our sample. If any two individuals from our sample belonged to distinct species,  
this statistics should take a high value. We rather found that the maximal pairwise  $F$  equals a low  
0.12, indicating that the absence of homozygote excess in *C. nigra* (Figure 1) is not explained by the

150 presence of a few "hybrids" in our sample, but rather reflects an overall lack of genetic differentiation.

The sample of Loire et al. (2013) is small in terms of the number of individuals and obviously insufficient to provide a definitive answer regarding population genetic structure in *C. nigra*. Our  
155 sample, however, is large with regard to the number of loci. Distinct loci independently sample the coalescent process, and therefore provide small but many pieces of information on population history. The strength of even small-sized samples to reconstruct population processes, provided that a large number of loci is available, has been demonstrated in a number of recent publications (e.g. Der Sarkissian et al. 2015, Abascal et al. 2016). The popular PSMC method (Li and Durbin 2011),  
160 for instance, estimates former fluctuations in effective population size based on a single diploid genome. Roux et al. (2016) specifically demonstrated the potential of the Romiguier et al. (2014) data set to inform on species boundary and the history of gene flow between populations.

Our results, if confirmed, are highly relevant for the conservation of Galápagos tortoises. They  
165 could imply that the current practice whereby only individuals from the same "species" are crossed is not only pointless – in the absence of truly differentiated gene pools – but also potentially harmful to the species due to the risk of inbreeding depression. The risk is particularly high when large numbers of closely related individuals are simultaneously released in a closed area (Milinkovitch et al. 2004). In the same vein, physical removal from the field of naturally occurring ‘hybrids’  
170 (Milinkovitch et al. 2007) and sterilization of individuals to avoid undesired crosses (Hunter et al. 2013) might well actively participate in the decline in the mean fitness of local populations (Frankham et al. 2014).

Of note, even the most recent publications on this issue, including the description of a new species  
175 (Poulakakis et al. 2015) have focused on the same limited set of markers developed some 15 years ago. We suggest that, nowadays in the genomic era, the conservation policy regarding Galápagos tortoises should no longer be based entirely on just a dozen loci, given the demonstrated potential of genome-wide data to enhance population genetics research in other groups of threatened animals (e.g. Liu et al. 2014, Moore et al. 2014, Der Sarkissian et al. 2015, Dobrynin et al. 2015,  
180 Lamichaney et al. 2015, Abascal et al. 2016). Knowing the importance of inbreeding depression as a threat to conservation of endangered species (e.g. Allendorf et al. 2010, Walling et al. 2011, Frankham 2015) we suggest that forced inbreeding and sterilization interventions in Galápagos tortoises be delayed until the genetic architecture of the species is clarified via the analysis of genome-wide data in a sufficiently large sample, thus resolving the discrepancy between existing

185 datasets.

There is some controversy and subjectivity in the definition of relevant conservation units and strategies (Edmands 2007, Funk et al. 2012, Shaffer et al. 2015, Taylor et al. 2017). Giant Galapagos tortoises are maximally protected throughout the archipelago. The definition of conservation units in  
190 *C. nigra*, therefore, is not relevant to the preservation of local populations. Rather, genetic data have been used to make decisions on which individuals should be crossed with which, and where they should be located. This is only meaningful if the distinct entities are sufficiently isolated, genetically and geographically, such that gene flow is naturally low. This is why species boundaries matter: current conservation goals in *C. nigra* are dependent on the validity of the existing population  
195 model and taxonomy.

It is likely that human intervention during the last centuries has not only dramatically affected *C. nigra* population density, but also favoured migration of individuals across islands. It is also quite likely, based on existing data, that gene flow between islands and/or local extinction/recolonization  
200 was substantial before human intervention, preventing speciation in *C. nigra* – otherwise hybrids would not be so common, total genetic diversity/divergence would be higher, population substructure would be stronger and more obviously correlated to morphology. In other words, *C. nigra* might well be better described as a perturbed metapopulation than a collection of endangered species. If this was true then the goals of resurrecting ancestral "lineages" and preventing crosses  
205 between genetic entities would just be nonsense. Only a genome-wide analysis has the power to discriminate between ancient and recent gene flow, clarify the link between genotype and phenotype, and inform conservation policies. Current management aims at preserving/restoring particular combinations of alleles at 12 specific loci; relevance to phenotypes, fitness, population history and species barriers in *C. nigra* is anything but clear.

210

## References

Abascal F, Corvelo A, Cruz F, Villanueva-Cañas JL, Vlasova A, Marcet-Houben M, Martínez-Cruz  
215 B, Cheng JY, Prieto P, Quesada V, Quilez J, Li G, García F, Rubio-Camarillo M, Frias L, Ribeca P, Capella-Gutiérrez S, Rodríguez JM, Câmara F, Lowy E, Cozzuto L, Erb I, Tress ML, Rodríguez-Ales JL, Ruiz-Orera J, Reverter F, Casas-Marce M, Soriano L, Arango JR, Derdak S, Galán B, Blanc J, Gut M, Lorente-Galdos B, Andrés-Nieto M, López-Otín C, Valencia A, Gut I, García JL, Guigó R, Murphy WJ, Ruiz-Herrera A, Marques-Bonet T, Roma G, Notredame C,



- 220 Mailund T, Albà MM, Gabaldón T, Alioto T, Godoy JA. 2016. Extreme genomic erosion after recurrent demographic bottlenecks in the highly endangered Iberian lynx. *Genome Biol* 17:251.
- Aguilera WT, Málaga J, Gibbs JP. 2015. Conservation: Giant tortoises hatch on Galapagos island. *Nature* 517:271.
- Allendorf FW, Hohenlohe PA, Luikart G. 2010. Genomics and the future of conservation genetics. 225 *Nat Rev Genet* 11:697-709.
- Ballenghien M, Faivre N, Galtier N. 2017. Patterns of cross-contamination in a multi-species population genomic project: detection, quantification, impact, solutions. *BMC Biology* 15:25.
- Bazin E, Glémin S, Galtier N. 2006. Population size does not influence mitochondrial genetic diversity in animals. *Science* 312:570-572.
- 230 Caccone A, Gentile G, Gibbs JP, Fritts TH, Snell HL, Betts J, Powell JR. 2002. Phylogeography and history of giant Galápagos tortoises. *Evolution* 56:2052-2066.
- Caccone A, Gentile G, Burns CE, Sezzi E, Bergman W, Ruelle M, Saltonstall K, Powell JR. 2004. Extreme difference in rate of mitochondrial and nuclear DNA evolution in a large ectotherm, Galápagos tortoises. *Mol Phylogenet Evol* 31:794-798.
- 235 Cayot LJ. 2008. The restoration of giant tortoises and land iguana populations in Galápagos. *Galápagos Res* 65:39-43.
- Chiari Y, Hyseni C, Fritts TH, Glaberman S, Marquez C, Gibbs JP, Claude J, Caccone A. 2009. Morphometrics parallel genetics in a newly discovered and endangered taxon of Galápagos tortoise. *PLoS One* 4:e6272.
- 240 Ciofi C, Milinkovitch MC, Gibbs JP, Caccone A, Powell JR. 2002. Microsatellite analysis of genetic divergence among populations of giant Galápagos tortoises. *Mol Ecol* 11:2265-2283.
- Der Sarkissian C, Ermini L, Schubert M, Yang MA, Librado P, Fumagalli M, Jónsson H, Bar-Gal GK, Albrechtsen A, Vieira FG, Petersen B, Ginolhac A, Seguin-Orlando A, Magnussen K, Fages A, Gamba C, Lorente-Galdos B, Polani S, Steiner C, Neuditschko M, Jagannathan V, Feh C, 245 Greenblatt CL, Ludwig A, Abramson NI, Zimmermann W, Schafberg R, Tikhonov A, Sicheritz-Ponten T, Willerslev E, Marques-Bonet T, Ryder OA, McCue M, Rieder S, Leeb T, Slatkin M, Orlando L. 2015. Evolutionary genomics and conservation of the endangered Przewalski's horse. *Curr Biol* 25:2577-2583.
- Dobrynin P, Liu S, Tamazian G, Xiong Z, Yurchenko AA, Krashennnikova K, Kliver S, Schmidt-Küntzel A, Koepfli KP, Johnson W, Kuderna LF, García-Pérez R, Manuel Md, Godinez R, Komissarov A, Makunin A, Brukhin V, Qiu W, Zhou L, Li F, Yi J, Driscoll C, Antunes A, Oleksyk TK, Eizirik E, Perelman P, Roelke M, Wildt D, Diekhans M, Marques-Bonet T, Marker L, Bhak J, Wang J, Zhang G, O'Brien SJ. 2015. Genomic legacy of the African cheetah, *Acinonyx jubatus*. *Genome Biol* 16:277.

- 255 Edmands S. 2007. Between a rock and a hard place: evaluating the relative risks of inbreeding and  
outbreeding for conservation and management. *Mol Ecol* 16:463-475.
- Edwards DL, Benavides E, Garrick RC, Gibbs JP, Russello MA, Dion KB, Hyseni C, Flanagan JP,  
Tapia W, Caccone A. 2013. The genetic legacy of Lonesome George survives: Giant tortoises  
with Pinta Island ancestry identified in Galápagos. *Biol Cons* 157:225-228.
- 260 Edwards DL, Garrick RC, Tapia W, Caccone A. 2014. Cryptic structure and niche divergence within  
threatened Galápagos giant tortoises from southern Isabela Island. *Conserv. Genet.* 15:1357–  
1369.
- Frankham R, Bradshaw CJA, Brook BW. 2014. Genetics in conservation management: revised  
recommendations for the 50/500 rules, Red List criteria and population viability analyses. *Biol*  
265 *Conserv* 170:56-63.
- Frankham R. 2015. Genetic rescue of small inbred populations: meta-analysis reveals large and  
consistent benefits of gene flow. *Mol Ecol* 24:2610-2618.
- Funk WC, McKay JK, Hohenlohe PA, Allendorf FW. 2012. Harnessing genomics for delineating  
conservation units. *Trends Ecol Evol* 27:489-496.
- 270 Galtier N. 2016. Adaptive protein evolution in animals and the effective population size hypothesis.  
*PLoS Genet* 12:e1005774.
- Gayral P, Melo-Ferreira J, Glémin S, Bierne N, Carneiro M, Nabholz B, Lourenco JM, Alves PC,  
Ballenghien M, Faivre N, Belkhir K, Cahais V, Loire E, Bernard A, Galtier N. 2013. Reference-  
free population genomics from next-generation transcriptome data and the vertebrate-  
275 invertebrate gap. *PLoS Genet* 9:e1003457.
- Garrick RC, Benavides E, Russello MA, Gibbs JP, Poulakakis N, Dion KB, Hyseni C, Kajdacs B,  
Márquez L, Bahan S, Ciofi C, Tapia W, Caccone A. 2012. Genetic rediscovery of an 'extinct'  
Galápagos giant tortoise species. *Curr Biol* 22:R10-1.
- Garrick RC, Benavides E, Russello MA, Hyseni C, Edwards DL, Gibbs JP, Tapia W, Ciofi C,  
280 Caccone A. 2014. Lineage fusion in Galápagos giant tortoises. *Mol Ecol* 23:5276-5290.
- Gibbs JP, Hunter EA, Shoemaker KT, Tapia WH, Cayot LJ. 2014. Demographic outcomes and  
ecosystem implications of giant tortoise reintroduction to Española Island, Galapagos. *PLoS One*  
9:e110742.
- Hunter EA, Gibbs JP, Cayot LJ, Tapia W. 2013. Equivalency of Galápagos giant tortoises used as  
285 ecological replacement species to restore ecosystem functions. *Conserv Biol* 27:701-709.
- Lamichhaney S, Berglund J, Almén MS, Maqbool K, Grabherr M, Martinez-Barrio A, Promerová  
M, Rubin CJ, Wang C, Zamani N, Grant BR, Grant PR, Webster MT, Andersson L. 2015.  
Evolution of Darwin's finches and their beaks revealed by genome sequencing. *Nature* 518:371-  
375.

- 290 Li H, Durbin R. 2011. Inference of human population history from individual whole-genome sequences. *Nature* 475:493–496.
- Liu S, Lorenzen ED, Fumagalli M, Li B, Harris K, Xiong Z, Zhou L, Korneliussen TS, Somel M, Babbitt C, Wray G, Li J, He W, Wang Z, Fu W, Xiang X, Morgan CC, Doherty A, O'Connell MJ, McInerney JO, Born EW, Dalén L, Dietz R, Orlando L, Sonne C, Zhang G, Nielsen R, Willerslev  
295 E, Wang J. 2014. Population genomics reveal recent speciation and rapid evolutionary adaptation in polar bears. *Cell* 157:785-794.
- Loire E, Chiari Y, Bernard A, Cahais V, Romiguier J, Nabholz B, Lourenço JM, Galtier N. 2013. Population genomics of the endangered giant Galápagos tortoise. *Genome Biol* 14:R136.
- Marquez C, Gibbs JP, Carrion V, Naranjo S, Llerena A. 2013. Population response of Giant  
300 Galápagos Tortoises to feral goat removal. *Restoration Ecol* 2:181-185.
- Milinkovitch MC, Monteyne D, Gibbs JP, Fritts TH, Tapia W, Snell HL, Tiedemann R, Caccone A, Powell JR. 2004. Genetic analysis of a successful repatriation programme: giant Galápagos tortoises. *Proc Biol Sci* 271:341-345.
- Milinkovitch MC, Monteyne D, Russello M, Gibbs JP, Snell HL, Tapia W, Marquez C, Caccone A,  
305 Powell JR. 2007. Giant Galápagos tortoises; molecular genetic analyses identify a trans-island hybrid in a repatriation program of an endangered taxon. *BMC Ecol* 7:2.
- Moore JS, Bourret V, Dionne M, Bradbury I, O'Reilly P, Kent M, Chaput G, Bernatchez L. 2014. Conservation genomics of anadromous Atlantic salmon across its North American range: outlier loci identify the same patterns of population structure as neutral loci. *Mol Ecol* 23:5680-5697.
- 310 Nichols H. 2015. Lonesome George 'look-alike' captured for tortoise-breeding effort. *Nature News* doi:10.1038/nature.2015.18955.
- Perry GH, Melsted P, Marioni JC, Wang Y, Bainer R, Pickrell JK, Michelini K, Zehr S, Yoder AD, Stephens M, Pritchard JK, Gilad Y. 2012. Comparative RNA sequencing reveals substantial genetic variation in endangered primates. *Genome Res* 22:602-610.
- 315 Poulakakis N, Glaberman S, Russello M, Beheregaray LB, Ciofi C, Powell JR, Caccone A. 2008. Historical DNA analysis reveals living descendants of an extinct species of Galápagos tortoise. *Proc Natl Acad Sci U S A* 105:15464-15469.
- Poulakakis N, Russello M, Geist D, Caccone A. 2012. Unravelling the peculiarities of island life: vicariance, dispersal and the diversification of the extinct and extant giant Galápagos tortoises.  
320 *Mol Ecol* 21:160-173.
- Poulakakis N, Edwards DL, Chiari Y, Garrick RC, Russello MA, Benavides E, Watkins-Colwell GJ, Glaberman S, Tapia W, Gibbs JP, Cayot LJ, Caccone A. 2015. Description of a new Galapagos giant tortoise species (*Chelonoidis*; Testudines: Testudinidae) from Cerro Fatal on Santa Cruz Island. *PLoS One* 10:e0138779.

- 325 Romiguier J, Gayral P, Ballenghien M, Bernard A, Cahais V, Chenuil A, Chiari Y, Dernet R, Duret  
L, Faivre N, Loire E, Lourenco JM, Nabholz B, Roux C, Tsagkogeorga G, Weber AA, Weinert  
LA, Belkhir K, Bierne N, Glémin S, Galtier N. 2014. Comparative population genomics in  
animals uncovers the determinants of genetic diversity. *Nature* 515:261-263.
- Romiguier J, Fournier A, Yek SH, Keller L. 2017. Convergent evolution of social hybridogenesis in  
330 *Messor* harvester ants. *Mol Ecol* 26:1108-1117.
- Roux C, Fraïsse C, Romiguier J, Anciaux Y, Galtier N, Bierne N 2016. Shedding light on the grey  
zone of speciation along a continuum of genomic divergence. *PLoS Biology* 14:e2000234.
- Russello MA, Beheregaray LB, Gibbs JP, Fritts T, Havill N, Powell JR, Caccone A. 2007.  
Lonesome George is not alone among Galápagos tortoises. *Curr Biol* 17:R317-318.
- 335 Shafer AB, Wolf JB, Alves PC, Bergström L, Bruford MW, Brännström I, Colling G, Dalén L, De  
Meester L, Ekblom R, Fawcett KD, Fior S, Hajibabaei M, Hill JA, Hoebel AR, Höglund J,  
Jensen EL, Krause J, Kristensen TN, Krützen M, McKay JK, Norman AJ, Ogden R, Österling  
EM, Ouborg NJ, Piccolo J, Popović D, Primmer CR, Reed FA, Roumet M, Salmona J,  
Schenekar T, Schwartz MK, Segelbacher G, Senn H, Thaulow J, Valtonen M, Veale A, Vergeer P,  
340 Vijay N, Vilà C, Weissensteiner M, Wennerström L, Wheat CW, Zieliński P. Genomics and the  
challenging translation into conservation practice. *Trends Ecol Evol* 30:78-87.
- Taylor BL, Perrin WF, Reeves RR, Rosel PE, Wang JY, Cipriano F, Baker CS, Brownell RL Jr.  
2017. Why we should develop guidelines and quantitative standards for using genetic data to  
delimit subspecies for data-poor organisms like cetaceans *Mar Mamm Sci*  
345 33:12-26.
- Walling CA, Nussey DH, Morris A, Clutton-Brock TH, Kruuk LE, Pemberton JM. 2011. Inbreeding  
depression in red deer calves. *BMC Evol Biol* 11:318.

350

## Figure legend.

### Figure 1. Genetic diversity and population substructure in 53 species and 25 pairs of congeneric species of animals.

355

Each filled circle corresponds to a single species of animals in which the transcriptome of at least four individuals was sequenced (Perry et al. 2012, Romiguier et al. 2014). Harvest ant *Messor barbarus* was excluded due to its highly specific mating system (Romiguier et al. 2017). Each open circle corresponds to a pair of congeneric species of animals in which the transcriptome of at least  
360 five individuals was sequenced (Galtier 2016). Genotypes were called using the improved, contamination-aware algorithm of Ballenghien et al. (2017), parameter  $\gamma$  being set to 0.2. X-axis (log scale) reflects the amount of neutral genetic variation within the sample. This is measured by the synonymous-site heterozygosity,  $\pi_s$ , for single species, and by the proportion of fixed  
synonymous differences for species pairs. Y-axis reflects the detected amount of population  
365 substructure, measured by the F statistics. The positions in the graph of *C. nigra*, *Homo sapiens* (single species) and of the *C. nigra/Chelonoidis carbonaria* pair are indicated by thumbnails.

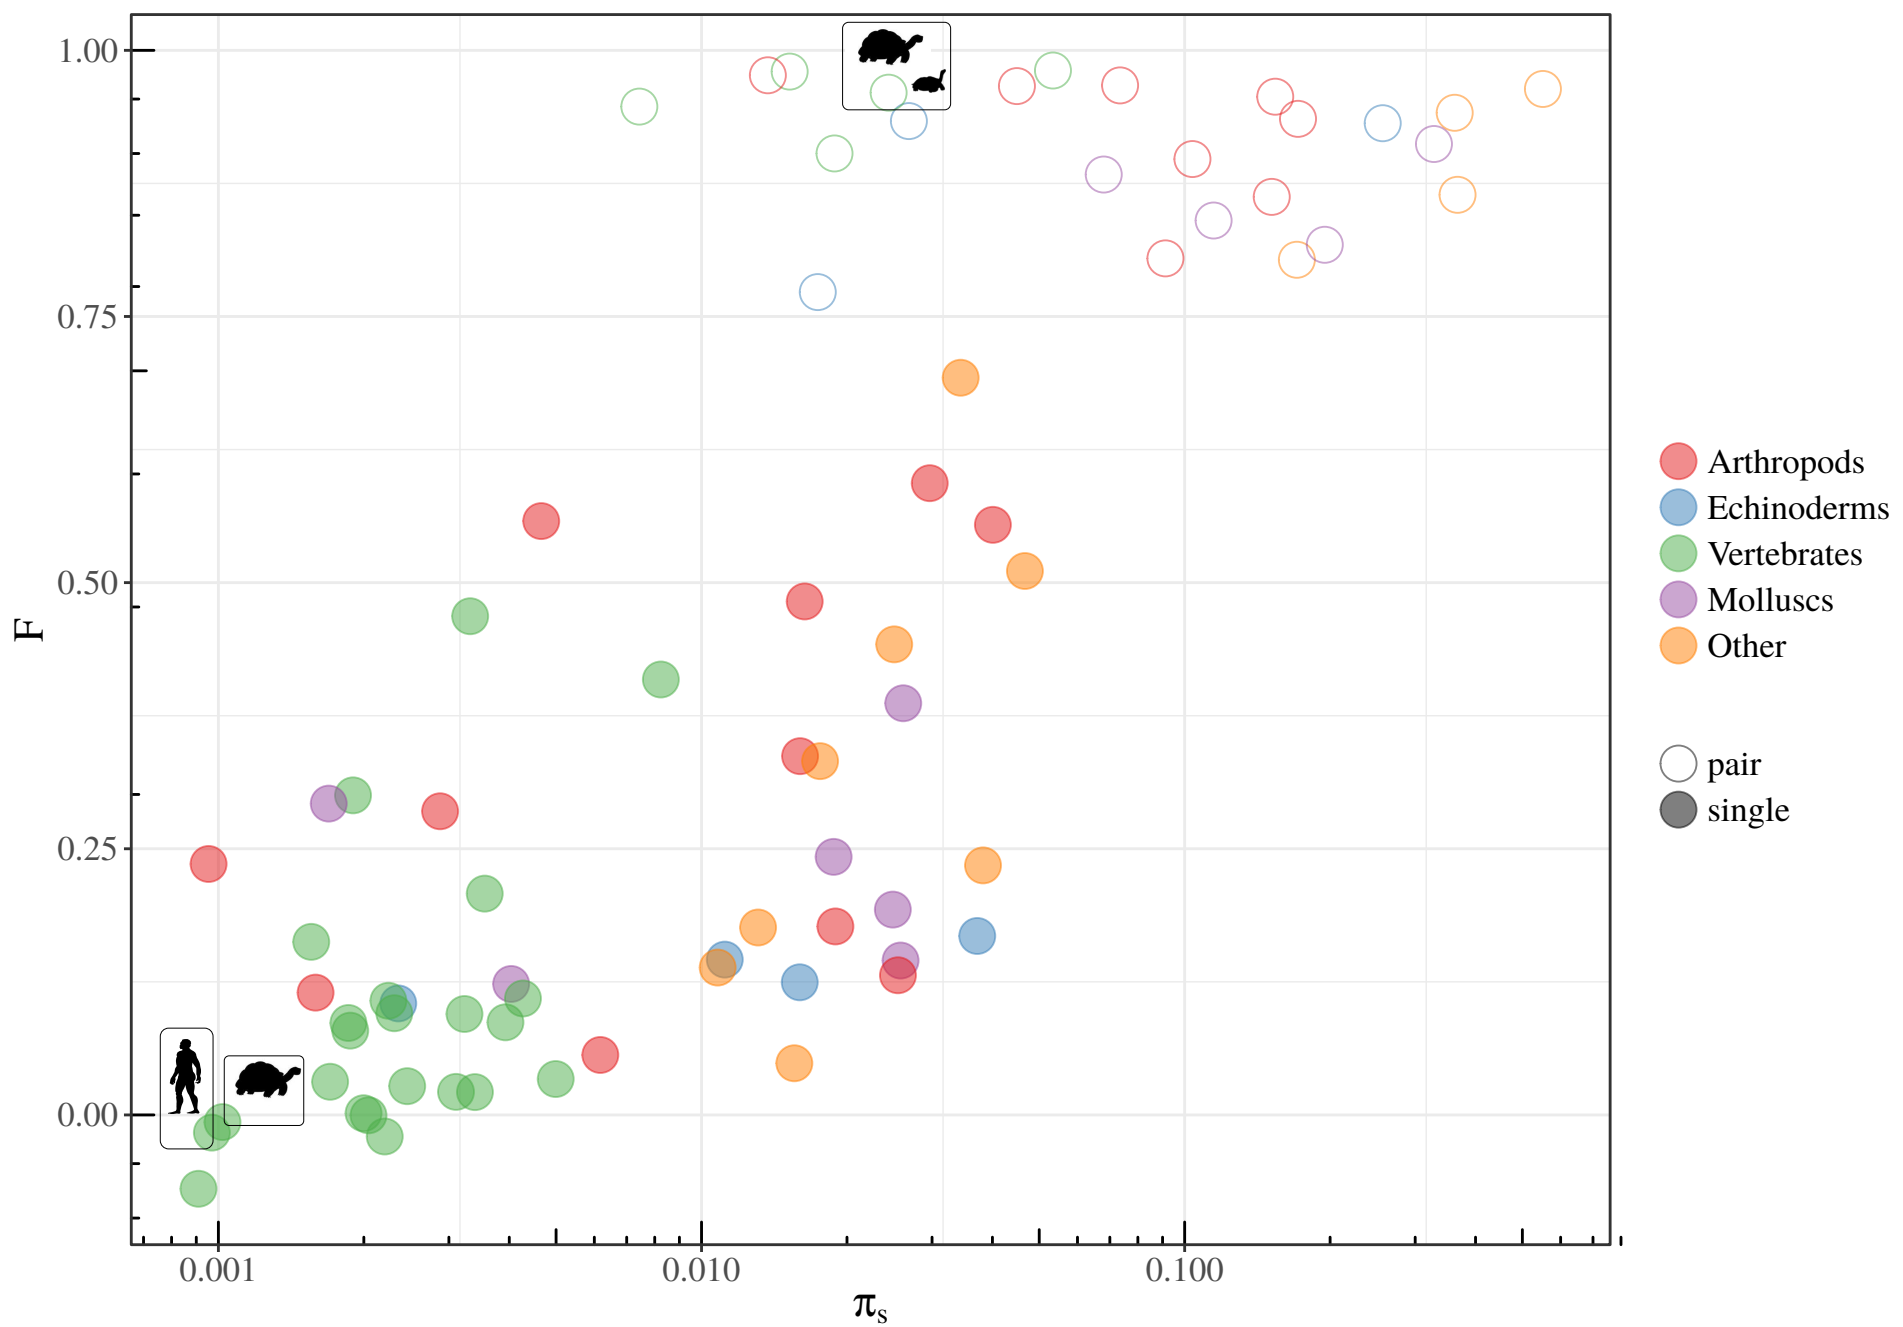

Source: https://www.biorxiv.org/content/biorxiv/early/2017/09/26/101980.full.pdf
